# Supplementary material
Source: publisher figshare collection journal article supplement (https://acs.figshare.com/ndownloader/files/5152438)
Supplement: Supplementary file 1 [file 5152438]

data_1
_audit_creation_date        04-07-05
_audit_creation_method CRYSTALS_ver_12.20
_publ_requested_journal          J.Am.Chem.Soc.
_publ_section_title
;
Synthesis, Crystal structure and Transistor
Performances of Tetracene Derivatives
;
_publ_contact_author_name        'Zhenan Bao'
_publ_contact_author_email       zbao@chemeng.stanford.edu
_publ_contact_author_address
;Department of Chemical Engineering, Stanford University,
Stanford, California 94305
;
loop_
_publ_author_name
_publ_author_address

'Moon, Hyunsik'
;Bell Laboratories, Lucent Technologies, Murray Hill, New Jersey 07974,USA
;
' Zeis, Roswitha'
;Bell Laboratories, Lucent Technologies, Murray Hill, New Jersey 07974,USA
;
',Borkent, Evert-Jan '
;Bell Laboratories, Lucent Technologies, Murray Hill, New Jersey 07974,USA
;
' Lovinger, Andrew J.'
;Bell Laboratories, Lucent Technologies, Murray Hill, New Jersey 07974,USA
;
' Besnard, C\'eline'
;Department of materials Chemistry
Lund University
Sweden
;
'Siegrist, Theo'
;Bell Laboratories, Lucent Technologies, Murray Hill, New Jersey 07974
;
'Kloc, Christian'
;Bell Laboratories, Lucent Technologies, Murray Hill, New Jersey 07974
;

'Bao, Zhenan'
;Department of Chemical Engineering, Stanford University,
Stanford, California 94305
;

_publ_requested_category         FA

_chemical_name_systematic         # IUPAC name, in full
;
?
;

_chemical_melting_point           ?

# choose from 'full, fullcycle, atomblock, userblock, diagonal, sparse'
_refine_ls_matrix_type            full

# choose from 'heavy, direct, difmap, geom'
_atom_sites_solution_primary      direct

# _atom_sites_solution_secondary difmap
_atom_sites_solution_hydrogens    geom

# choose from 'none, undef, noref, refall, refxyz, refU, constr, mixed'
_refine_ls_hydrogen_treatment     mixed

#****************************************************************************
# General computing
#=============================================================
_computing_structure_refinement
;
  CRYSTALS (Watkin et al 2003)
;
_computing_publication_material
;
  CRYSTALS (Watkin et al 2003)
;
_computing_molecular_graphics
;
  CAMERON (Watkin et al 1996)
;
#=============================================================

_cell_length_a                    10.7752(15)
_cell_angle_alpha                 90
_cell_length_b                    14.371(2)
_cell_angle_beta                  93.868(11)
_cell_length_c                    8.0670(12)
_cell_angle_gamma                 90
_cell_volume                      1246.3(3)

_symmetry_cell_setting            'Monoclinic'
_symmetry_space_group_name_H-M    'P 1 21/c 1 '
loop_
  _symmetry_equiv_pos_as_xyz
  'x,y,z'
  '-x,-y,-z'
  '-x,y+1/2,-z+1/2'
  'x,-y+1/2,z+1/2'

# choose from: rm (reference molecule of
# known chirality), ad (anomolous
# dispersion - ie. Flack param), rmad
# (both rm and ad), syn (known from
# synthetic pathway), unk (unknown)
# or . (not applicable).

_chemical_absolute_configuration  '.'

loop_
_atom_type_symbol
_atom_type_scat_dispersion_real
_atom_type_scat_dispersion_imag
_atom_type_scat_Cromer_Mann_a1
_atom_type_scat_Cromer_Mann_b1
_atom_type_scat_Cromer_Mann_a2
_atom_type_scat_Cromer_Mann_b2
_atom_type_scat_Cromer_Mann_a3
_atom_type_scat_Cromer_Mann_b3
_atom_type_scat_Cromer_Mann_a4
_atom_type_scat_Cromer_Mann_b4
_atom_type_scat_Cromer_Mann_c
_atom_type_scat_source
  'C   '    0.0033    0.0016    2.3100   20.8439
     1.0200   10.2075    1.5886    0.5687    0.8650   51.6512    0.2156
'International_Tables_Vol_IV_Table_2.2B'
  'H   '    0.0000    0.0000    0.4930   10.5109
     0.3229   26.1257    0.1402    3.1424    0.0408   57.7998    0.0030
'International_Tables_Vol_IV_Table_2.2B'
  'Cl  '    0.1484    0.1585   11.4604    0.0104
     7.1964    1.1662    6.2556   18.5194    1.6455   47.7784   -9.5574
'International_Tables_Vol_IV_Table_2.2B'
  'H   '    0.0000    0.0000    0.4930   10.5109
     0.3229   26.1257    0.1402    3.1424    0.0408   57.7998    0.0030
'International_Tables_Vol_IV_Table_2.2B'


_cell_formula_units_Z                    4
_chemical_formula_sum             ' C18 H11 Cl1 '
_chemical_formula_moiety          ' C18 H11 Cl1 '
_chemical_compound_source
;
?
;
_chemical_formula_weight            262.66


_cell_measurement_reflns_used            0
_cell_measurement_theta_min              3
_cell_measurement_theta_max              32
_cell_measurement_temperature          293

_exptl_crystal_description        ' platelet '
_exptl_crystal_colour             ' orange '
_exptl_crystal_size_min           0.01
_exptl_crystal_size_mid           0.1
_exptl_crystal_size_max           0.2

_exptl_crystal_density_diffrn     1.4
_exptl_crystal_density_meas       ?
# Non-dispersive F(000):
_exptl_crystal_F_000              544
_exptl_absorpt_coefficient_mu     0.288

_diffrn_measurement_device_type
;
Unknown
;
_diffrn_radiation_monochromator   graphite
_computing_data_collection
;
  DATA COLLECTION
;
_computing_data_reduction
;
  USER DEFINED 5
;
_computing_cell_refinement
;
  USER DEFINED 6
;
_computing_structure_solution
;
  SHELXS 86 (Sheldrick, 1986)
;

_diffrn_measurement_method        \w/2\q

_exptl_absorpt_correction_type    none
_exptl_absorpt_correction_T_min   1.00
_exptl_absorpt_correction_T_max   1.00
# Sheldrick geometric definitions 1.00 1.00


_diffrn_standards_interval_time   0
_diffrn_standards_interval_count  0
_diffrn_standards_number          0
_diffrn_standards_decay_%         0.00

_diffrn_ambient_temperature        293
_diffrn_reflns_number             26776
_reflns_number_total              4126
_diffrn_reflns_av_R_equivalents   0.17
# Number of reflections with Friedels Law is 4126
# Number of reflections without Friedels Law is 0
# Theoretical number of reflections is about 4191


_diffrn_reflns_theta_min          2.835
_diffrn_reflns_theta_max          32.102
_diffrn_measured_fraction_theta_max 0.946

_diffrn_reflns_theta_full         30.497
_diffrn_measured_fraction_theta_full 0.997


_diffrn_reflns_limit_h_min        -16
_diffrn_reflns_limit_h_max        15
_diffrn_reflns_limit_k_min        -21
_diffrn_reflns_limit_k_max        21
_diffrn_reflns_limit_l_min        -11
_diffrn_reflns_limit_l_max        11
_reflns_limit_h_min               -16
_reflns_limit_h_max               15
_reflns_limit_k_min               0
_reflns_limit_k_max               21
_reflns_limit_l_min               0
_reflns_limit_l_max               11


_refine_diff_density_min          -0.22
_refine_diff_density_max          0.27


_refine_ls_number_reflns          1092
_refine_ls_number_restraints      0
_refine_ls_number_parameters      172

#_refine_ls_R_factor_ref 0.0390
_refine_ls_wR_factor_ref          0.0418
_refine_ls_goodness_of_fit_ref    1.1525

#_reflns_number_all 4118
_refine_ls_R_factor_all           0.2112
_refine_ls_wR_factor_all          0.1440

# The I/u(I) cutoff below was used for refinement as
# well as the _gt R-factors:
_reflns_threshold_expression      I>2.00u(I)
_reflns_number_gt                 1092
_refine_ls_R_factor_gt            0.0390
_refine_ls_wR_factor_gt           0.0418


_refine_ls_shift/su_max           0.038350
_refine_ls_structure_factor_coef  F
_refine_ls_weighting_scheme       calc
_refine_ls_weighting_details
;
  Method, part 1, Chebychev polynomial, (Watkin, 1994, Prince, 1982)
  [weight] = 1.0/[A~0~*T~0~(x)+A~1~*T~1~(x) ... +A~n-1~]*T~n-1~(x)]
  where A~i~ are the Chebychev coefficients listed below and x= Fcalc/Fmax
  Method = Robust Weighting (Prince, 1982)
  W = [weight] * [1-(deltaF/6*sigmaF)^2^]^2^
  A~i~ are:
  0.409 0.413 0.193
;
_diffrn_radiation_type            'Mo K\a'
_diffrn_radiation_wavelength           0.71073


## -------------------REFERENCES ----------------------##
## Insert your own references - in alphabetic order
_publ_section_references
;


User-defined data collection reference


Spare 5


Spare 6


Betteridge, P.W., Carruthers, J.R., Cooper, R.I.,
Prout, K., Watkin, D.J. (2003). J. Appl. Cryst. 36, 1487.


Prince, E.
Mathematical Techniques in Crystallography
and Materials Science
Springer-Verlag, New York, 1982.


Sheldrick, G.M. (1986). SHELXS86. Program for the solution of
crystal structures. Univ. of Gottingen, Federal Republic of Germany.


Watkin D.J. (1994),
Acta Cryst, A50, 411-437


Watkin, D.J., Prout, C.K. & Pearce, L.J. (1996) CAMERON, Chemical
Crystallography Laboratory, OXFORD, UK.
;

# Uequiv = arithmetic mean of Ui
# i.e. Ueqiv = (U1+U2+U3)/3

# Replace trailing . with the number of unfound
# hydrogen atoms attaced to relavent atom

loop_
_atom_site_label
_atom_site_type_symbol
_atom_site_fract_x
_atom_site_fract_y
_atom_site_fract_z
_atom_site_U_iso_or_equiv
_atom_site_occupancy
_atom_site_adp_type
_atom_site_refinement_flags
_atom_site_disorder_assembly
_atom_site_disorder_group
_atom_site_attached_hydrogens
H3 H 0.5808 0.4411 0.7946 0.0558 1.0000 Uiso . . . .
H5 H 0.3973 0.4424 0.9660 0.0759 1.0000 Uiso . . . .
H6 H 0.1860 0.4131 0.9888 0.0820 1.0000 Uiso . . . .
H7 H 0.0619 0.3470 0.7671 0.0814 1.0000 Uiso . . . .
H8 H 0.1468 0.3098 0.5167 0.0696 1.0000 Uiso . . . .
H10 H 0.3306 0.3109 0.3420 0.0530 1.0000 Uiso . . . .
H12 H 0.5104 0.3094 0.1712 0.0520 1.0000 Uiso . . . .
H14 H 0.6915 0.3003 0.0030 0.0618 1.0000 Uiso . . . .
H15 H 0.9043 0.3162 -0.0214 0.0765 1.0000 Uiso . . . .
H16 H 1.0346 0.3766 0.2027 0.0772 1.0000 Uiso . . . .
H17 H 0.9524 0.4263 0.4495 0.0661 1.0000 Uiso . . . .
C1 C 0.7123(3) 0.41017(19) 0.5286(3) 0.0378 1.0000 Uani . . . .
C2 C 0.5856(3) 0.39487(19) 0.5525(3) 0.0348 1.0000 Uani . . . .
C3 C 0.5304(3) 0.41414(19) 0.7017(3) 0.0399 1.0000 Uani . . . .
C4 C 0.4062(3) 0.3960(2) 0.7199(3) 0.0399 1.0000 Uani . . . .
C5 C 0.3491(3) 0.4155(2) 0.8716(4) 0.0514 1.0000 Uani . . . .
C6 C 0.2268(4) 0.3978(3) 0.8853(5) 0.0608 1.0000 Uani . . . .
C7 C 0.1514(3) 0.3586(3) 0.7525(5) 0.0626 1.0000 Uani . . . .
C8 C 0.2014(3) 0.3376(2) 0.6068(5) 0.0532 1.0000 Uani . . . .
C9 C 0.3297(3) 0.3566(2) 0.5838(4) 0.0414 1.0000 Uani . . . .
C10 C 0.3829(3) 0.3373(2) 0.4358(4) 0.0412 1.0000 Uani . . . .
C11 C 0.5094(3) 0.35567(18) 0.4146(3) 0.0346 1.0000 Uani . . . .
C12 C 0.5629(3) 0.3352(2) 0.2654(3) 0.0388 1.0000 Uani . . . .
C13 C 0.6881(3) 0.3495(2) 0.2467(4) 0.0386 1.0000 Uani . . . .
C14 C 0.7440(3) 0.3247(2) 0.0971(4) 0.0452 1.0000 Uani . . . .
C15 C 0.8679(3) 0.3345(2) 0.0830(4) 0.0562 1.0000 Uani . . . .
C16 C 0.9450(3) 0.3708(3) 0.2169(5) 0.0556 1.0000 Uani . . . .
C17 C 0.8975(3) 0.3975(2) 0.3607(4) 0.0488 1.0000 Uani . . . .
Cl1 Cl 0.80625(8) 0.45526(7) 0.69445(10) 0.0577 1.0000 Uani . . . .
C18 C 0.7675(3) 0.3877(2) 0.3826(3) 0.0369 1.0000 Uani . . . .
loop_
_atom_site_aniso_label
_atom_site_aniso_U_11
_atom_site_aniso_U_22
_atom_site_aniso_U_33
_atom_site_aniso_U_23
_atom_site_aniso_U_13
_atom_site_aniso_U_12
C1 0.0414(17) 0.0328(16) 0.0383(16) 0.0012(12) -0.0047(13) -0.0010(13)
C2 0.0370(17) 0.0322(16) 0.0349(15) -0.0005(12) -0.0008(13) 0.0019(13)
C3 0.0481(18) 0.0354(15) 0.0360(16) -0.0019(13) 0.0019(13) 0.0007(14)
C4 0.048(2) 0.0322(17) 0.0404(17) 0.0026(13) 0.0087(15) 0.0052(14)
C5 0.063(2) 0.0452(19) 0.0479(19) -0.0017(14) 0.0182(16) 0.0026(16)
C6 0.066(2) 0.061(2) 0.059(2) 0.0005(19) 0.033(2) 0.0086(19)
C7 0.049(2) 0.063(2) 0.078(3) 0.007(2) 0.0226(19) 0.0076(18)
C8 0.038(2) 0.054(2) 0.068(2) 0.0040(17) 0.0067(16) 0.0017(15)
C9 0.0422(17) 0.0353(16) 0.0471(18) 0.0027(14) 0.0062(14) 0.0056(13)
C10 0.0400(19) 0.0411(17) 0.0421(17) -0.0023(14) -0.0009(14) 0.0021(15)
C11 0.0362(16) 0.0309(14) 0.0365(16) 0.0018(12) 0.0007(13) 0.0017(13)
C12 0.0436(19) 0.0357(17) 0.0365(16) -0.0029(12) -0.0015(13) -0.0018(14)
C13 0.0460(18) 0.0286(15) 0.0414(17) 0.0034(12) 0.0040(14) -0.0002(13)
C14 0.061(2) 0.0376(17) 0.0383(17) -0.0043(13) 0.0116(15) -0.0039(15)
C15 0.059(2) 0.054(2) 0.059(2) -0.0014(17) 0.0275(18) 0.0002(18)
C16 0.043(2) 0.061(2) 0.064(2) 0.0036(18) 0.0173(18) -0.0044(16)
C17 0.0421(19) 0.0482(19) 0.056(2) 0.0034(15) 0.0057(16) -0.0069(15)
Cl1 0.0505(4) 0.0728(5) 0.0482(4) -0.0092(5) -0.0084(3) -0.0100(5)
C18 0.0405(18) 0.0324(15) 0.0375(16) 0.0028(12) 0.0008(13) -0.0025(13)
_refine_ls_extinction_method
     'None'
loop_
  _geom_bond_atom_site_label_1
  _geom_bond_site_symmetry_1
  _geom_bond_atom_site_label_2
  _geom_bond_site_symmetry_2
  _geom_bond_distance
  _geom_bond_publ_flag
H3 . C3 . 0.975    no
H5 . C5 . 0.972    no
H6 . C6 . 0.994    no
H7 . C7 . 0.993    no
H8 . C8 . 0.989    no
H10 . C10 . 0.988    no
H12 . C12 . 0.988    no
H14 . C14 . 0.981    no
H15 . C15 . 0.988    no
H16 . C16 . 0.983    no
H17 . C17 . 0.988    no
C1 . C2 . 1.409(4)    yes
C1 . Cl1 . 1.747(3)    yes
C1 . C18 . 1.393(4)    yes
C2 . C3 . 1.405(4)    yes
C2 . C11 . 1.451(4)    yes
C3 . C4 . 1.381(4)    yes
C4 . C5 . 1.434(4)    yes
C4 . C9 . 1.443(4)    yes
C5 . C6 . 1.354(5)    yes
C6 . C7 . 1.418(5)    yes
C7 . C8 . 1.360(5)    yes
C8 . C9 . 1.433(4)    yes
C9 . C10 . 1.387(4)    yes
C10 . C11 . 1.410(4)    yes
C11 . C12 . 1.400(4)    yes
C12 . C13 . 1.384(4)    yes
C13 . C14 . 1.429(4)    yes
C13 . C18 . 1.452(4)    yes
C14 . C15 . 1.355(5)    yes
C15 . C16 . 1.417(5)    yes
C16 . C17 . 1.354(4)    yes
C17 . C18 . 1.431(4)    yes
loop_
  _geom_angle_atom_site_label_1
  _geom_angle_site_symmetry_1
  _geom_angle_atom_site_label_2
  _geom_angle_site_symmetry_2
  _geom_angle_atom_site_label_3
  _geom_angle_site_symmetry_3
  _geom_angle
  _geom_angle_publ_flag
C2 . C1 . Cl1 . 118.0(2)    yes
C2 . C1 . C18 . 123.5(3)    yes
Cl1 . C1 . C18 . 118.4(2)    yes
C1 . C2 . C3 . 123.8(3)    yes
C1 . C2 . C11 . 117.3(3)    yes
C3 . C2 . C11 . 118.9(3)    yes
H3 . C3 . C2 . 119.378    no
H3 . C3 . C4 . 119.109    no
C2 . C3 . C4 . 121.5(3)    yes
C3 . C4 . C5 . 121.9(3)    yes
C3 . C4 . C9 . 120.1(3)    yes
C5 . C4 . C9 . 118.1(3)    yes
C4 . C5 . H5 . 120.570    no
C4 . C5 . C6 . 120.6(3)    yes
H5 . C5 . C6 . 118.833    no
H6 . C6 . C5 . 121.026    no
H6 . C6 . C7 . 117.336    no
C5 . C6 . C7 . 121.6(3)    yes
H7 . C7 . C6 . 119.255    no
H7 . C7 . C8 . 120.672    no
C6 . C7 . C8 . 120.1(3)    yes
H8 . C8 . C7 . 118.307    no
H8 . C8 . C9 . 120.890    no
C7 . C8 . C9 . 120.8(3)    yes
C4 . C9 . C8 . 118.8(3)    yes
C4 . C9 . C10 . 119.0(3)    yes
C8 . C9 . C10 . 122.2(3)    yes
H10 . C10 . C9 . 119.215    no
H10 . C10 . C11 . 119.021    no
C9 . C10 . C11 . 121.8(3)    yes
C2 . C11 . C10 . 118.7(3)    yes
C2 . C11 . C12 . 119.8(3)    yes
C10 . C11 . C12 . 121.4(3)    yes
H12 . C12 . C11 . 119.565    no
H12 . C12 . C13 . 118.863    no
C11 . C12 . C13 . 121.6(3)    yes
C12 . C13 . C14 . 121.7(3)    yes
C12 . C13 . C18 . 120.2(3)    yes
C14 . C13 . C18 . 118.1(3)    yes
H14 . C14 . C13 . 119.230    no
H14 . C14 . C15 . 119.528    no
C13 . C14 . C15 . 121.2(3)    yes
H15 . C15 . C14 . 119.550    no
H15 . C15 . C16 . 120.140    no
C14 . C15 . C16 . 120.3(3)    yes
H16 . C16 . C15 . 118.155    no
H16 . C16 . C17 . 120.423    no
C15 . C16 . C17 . 121.4(3)    yes
H17 . C17 . C16 . 119.836    no
H17 . C17 . C18 . 119.623    no
C16 . C17 . C18 . 120.5(3)    yes
C13 . C18 . C17 . 118.4(3)    yes
C13 . C18 . C1 . 117.6(3)    yes
C17 . C18 . C1 . 124.0(3)    yes
